# MS-CleanR: A feature-filtering approach to improve annotation rate in untargeted LC-MS based metabolomics

Ophélie Fraisier-Vannier<sup>1,4</sup>, Justine Chervin<sup>2,3</sup>, Guillaume Cabanac<sup>4</sup>, Virginie Puech-Pages<sup>2,3</sup>, Sylvie Fournier<sup>2,3</sup>, Virginie Durand<sup>2</sup>, Aurélien Amiel<sup>2,5</sup>, Olivier André<sup>2,5</sup>, Omar Abdelaziz Benamar<sup>2,5</sup>, Bernard Dumas<sup>2</sup>, Hiroshi Tsugawa<sup>6,7</sup> and Guillaume Marti<sup>1,2,3,4\*</sup>

<sup>1</sup> Pharma Dev, Université de Toulouse, IRD, UPS, Toulouse, France

<sup>2</sup> Laboratoire de Recherche en Sciences Végétales, Université de Toulouse, CNRS, UPS, France

<sup>3</sup> Metatoul-AgromiX platform, MetaboHUB, National Infrastructure for Metabolomics and Fluxomics, LRSV, Université de Toulouse, CNRS, UPS, France

<sup>4</sup> Institut de Recherche en Informatique de Toulouse, Université de Toulouse, UPS, Toulouse, France

<sup>5</sup> De Sangosse, Bonnel, 47480 Pont-Du-Casse, France

<sup>6</sup> RIKEN Center for Sustainable Resource Science, Yokohama, Japan

<sup>7</sup> RIKEN Center for Integrative Medical Science, Yokohama, Japan

## Abstract

Untargeted metabolomics using liquid chromatography-mass spectrometry (LC-MS) is currently the gold-standard technique to determine the full chemical diversity in biological samples. This approach still has many limitations, however; notably, the difficulty of estimating accurately the number of unique metabolites being profiled among the thousands of MS ion signals arising from chromatograms. Here, we describe a new workflow, MS-CleanR, based on the MS-DIAL/MS-FINDER suite, which tackles feature degeneracy and improves annotation rates. We show that implementation of MS-CleanR reduces the number of signals by nearly 80% while retaining 95% of unique metabolite features. Moreover, the annotation results from MS-FINDER can be ranked with respect to database chosen by the user, which improves identification accuracy. Application of MS-CleanR to the analysis of *Arabidopsis thaliana* grown in three different conditions improved class separation resulting from multivariate data analysis and lead to annotation of 75% of the final features. The full workflow was applied to metabolomic profiles from three strains of the leguminous plant *Medicago truncatula* that have different susceptibilities to the oomycete pathogen *Aphanomyces*

29 *euteiches*; a group of glycosylated triterpenoids overrepresented in resistant lines were identified as  
30 candidate compounds conferring pathogen resistance. MS-CleanR is implemented through a Shiny  
31 interface for intuitive use by end-users (available at: <https://github.com/eMetaboHUB/MS-CleanR>).

32 **Keywords:** Untargeted metabolomics, LC-MS, annotation, *Arabidopsis thaliana*, *Medicago*  
33 *truncatula*, MS-DIAL, MS-FINDER.

34 Untargeted, or discovery-based metabolomics has become an essential tool in all biological sciences  
35 including clinical research<sup>1,2</sup>, plant science<sup>3</sup> and natural product mining<sup>4</sup>, among many other  
36 applications. Living organisms are estimated to contain more than one million distinct compounds<sup>5</sup>.  
37 According to the MetaboLights database (DB), 80% of untargeted metabolomics workflows rely on  
38 liquid chromatography-mass spectrometry (LC-MS) (<https://www.ebi.ac.uk/metabolights/>). Due to its  
39 broad coverage of metabolites, LC-MS based metabolomics has become the preferred tool to detect  
40 several hundreds of compounds encountered in a complex biological material. Many software  
41 programs have been developed to turn features ( $m/z \times$  retention time (RT) pairs) extracted from LC-  
42 MS raw data into chromatographic peak lists, including web-based interfaces such as XCMS<sup>6</sup>,  
43 Workflow4Metabolomics<sup>7</sup>, local GUI with MZmine<sup>8</sup> and MS-DIAL<sup>9</sup>. Despite significant progress in  
44 feature extraction, it remains a challenge to estimate accurately the number of unique metabolites in a  
45 crude extract from the profile of one LC-MS experiment<sup>10</sup>. On average, untargeted LC-MS profiling  
46 yields hundred to thousands of features, which include isotopes, contaminants, adducts, dimers,  
47 multimers and heteromeric complexes, and artifacts. Patti and colleagues<sup>11</sup> used the term ‘degenerate  
48 features’ to describe multiple signals derived from the same metabolite; they demonstrated that feature  
49 inflation is highly underestimated and insufficiently addressed in untargeted LC-MS based  
50 metabolomics. This may have important consequences by increasing both the false annotation rate and  
51 the number of ‘unknown’ features arising from wrongly attributed signals. This is especially true when  
52 the annotation process is based on *in silico* modeling of fragmentation patterns, as are Sirius<sup>12</sup>, MS-  
53 FINDER<sup>13</sup>, MetFrag<sup>14</sup> or CFM-ID<sup>15</sup>, since tandem mass spectrometry (MS/MS) spectra are processed  
54 without taking into account feature relationships. Thus, most untargeted metabolomics studies focus  
55 on a subset of identified metabolites for which spectral data are easily accessible from public  
56 repositories or in-house DBs.

57 A few packages have been developed to deal with feature degeneracy: CAMERA<sup>16</sup> is based on adduct  
58 relationships; RAMClust<sup>17</sup> correlates features in multiple samples; MS-FLO<sup>18</sup> uses Pearson’s  
59 correlation and peak height similarity to identify adducts, duplicate peaks and isotope features of the  
60 main monoisotopic ion, and MZunity<sup>19</sup> which confronts adducts or neutral loss index to decipher  
61 relationship among the acquired high resolution pseudo-molecular ions list. Deep-learning approaches  
62 have also been developed based on LC-MS spectral peak shape filtering<sup>20,21</sup>. All these packages focus  
63 on a single type of degeneracy, however, and they are difficult to implement in a unified workflow.

64 Among the most advanced and versatile methods developed recently for untargeted metabolomics is  
65 the tandem MS-DIAL-MS-FINDER suite. MS-DIAL is an all-in-one program for metabolomics and  
66 lipidomics that relies on mass spectral libraries such as NIST 14 and MassBank of North America  
67 (MoNA) for metabolite annotation. MS-FINDER is a partner program of MS-DIAL, in which  
68 unknown structures can be elucidated from MS/MS spectra by the hydrogen rearrangement rules-  
69 based scoring system. Here, we describe a third tool in this suite, called MS-CleanR, to remove  
70 degenerate features and improve annotation rates from untargeted LC-MS-based metabolomics data.  
71 Starting from the aligned peak list files determined by the MS-DIAL deconvolution process, our R  
72 package firstly removes noise signals by using generic filters. In the second step, the package groups  
73 the ion features based on the results of the MS-DIAL peak character estimation algorithm<sup>22</sup> providing  
74 the ion linkages of adducts, correlated chromatograms, putative ion source fragments candidates and  
75 similar metabolite profiles among samples. In the third step, clustered ion features are merged between  
76 positive ionization (PI) and negative ionization (NI) modes and the adduct relationships are corrected  
77 accordingly. The cleaned-up feature list can be exported to MS-FINDER for annotation purposes.  
78 Finally, the package merges the MS-FINDER annotation output with the cleaned-up peak list and  
79 includes the possibility to prioritize identification according to the DBs used for MS-FINDER  
80 interrogation. The whole MS-CleanR workflow is easily accessible through a Shiny user interface  
81 (Figure 1) and it is available as open source code.

82

## 83 METHODS

### 84 Standards

85 Individual solutions of natural products (NPs) compounds (Metasci, Toronto, Canada) were prepared  
86 at 100 µg/mL in H<sub>2</sub>O or MeOH according to the supplier's recommendations. Mixes of 10 compounds  
87 were prepared by pooling 10 µL of each individual solution to a final concentration of 10 µg/mL. We  
88 selected 51 NPs eluting from 2-18 minutes as a first test mixture to construct DB-level 1 annotation.

89 IROA Mass Spectrometry Library of Standards (Sigma-Aldrich, Darmstadt, Germany) in 96-well  
90 plate format (5 µg per well) were used. The contents of each well were dissolved in 50 µL of solvent  
91 (5% MeOH or MeOH/CH<sub>3</sub>Cl/H<sub>2</sub>O 1:1:0.3), as recommended by the manufacturer, to obtain a  
92 concentration of 100 µg/mL. Each plate was then sonicated for 5 minutes. Mixes of up to 12  
93 compounds with distinct exact masses were obtained by pooling 20 µL from each well. The final  
94 concentration in each mix was 8 µg/mL. We selected 167 standards eluting from 2-18 minutes as a  
95 second test mixture.

96

## Plant material

97 *A. thaliana* (wild-type Col-O) were grown either in hydroponic culture, in plastic pots (high density),  
98 or in Jiffy® pots. For hydroponic culture, seeds were sown in 96 plates in MS liquid medium + 1%  
99 sucrose. After 11 days, the medium was replaced by MS medium. After 14 days, seedlings were  
100 collected and gently dried on absorbent paper. For culture in plastic pots, seeds were sown densely on  
101 soil in plastic pots and cultivated in a growth chamber with a cycle of 16h light-8h dark, at 22°C in the  
102 light and 20°C in the dark, and at 80% relative humidity. After 21 days, the aerial parts of the plants  
103 were collected. For culture in Jiffy® pots, three seeds were sown per pot and cultivated in a growth  
104 chamber, as for the plants in plastic pots. After 32 days, rosette leaves were harvested. For each  
105 growing condition 200 mg of plant material per sample were collected, placed in a FastPrep tube (MP  
106 Biomedicals Lysing Matrix D, Illkirch, France) and frozen in liquid nitrogen. For extraction, each  
107 sample was ground with a Mixer Mill MM 400 grinder (Retsch, Eragny sur Oise, France) by applying  
108 two cycles of 30 seconds at 30 m/sec. Biphasic sample extraction was adapted from Salem *et al.*  
109 2016<sup>23</sup> by adding two cycles of 20 seconds at 6 m/sec. in the FastPrep-24™ benchtop homogenizer  
110 (MP Biomedicals™, Illkirch, France) in 1 mL M1 (methyl tert-butyl ether/methanol, 3:1, v:v)  
111 extraction solution. After grinding, FastPrep tube was transferred in glass tube and 5.7 mL of M1 was  
112 added with 4.3 mL of M2 (water:methanol, 3:1, v:v) and vortexed for 1 min. The phases were  
113 separated by centrifugation at 4°C and 4000 rpm for 5 minutes. The aqueous phases (400 µL) were  
114 evaporated under nitrogen and the extracts were resuspended in 750 µL MeOH:H<sub>2</sub>O (1:1). Samples  
115 were filtered through 0.2 µm PTFE filters (Thermo Scientific™) and transferred to vials. An  
116 extraction blank (without plant material) and a QC (Quality Control) sample (aliquot of all samples)  
117 were also prepared to validate the LC-MS profiles.

118 Seeds of *Medicago truncatula* strains A17, DZA45.5 and F83005.5 (called F83 hereafter) were  
119 scarified with sand paper, sterilized in 3.2% bleach for 2 min then rinsed in water four times before  
120 soaking in water for 20 min. Seeds were placed on water agar and placed at 4°C for 4 days then for  
121 one night at 25°C to germinate. Germinated seedlings were transferred onto M medium<sup>24</sup> then placed  
122 in a growth chamber at 22°C and 50% humidity with cycles of 16h light-8h dark for 14 days. The  
123 roots were ground with a Mixer Mill MM 400 grinder by applying two cycles of 30 seconds at 300 Hz.  
124 One hundred milligrams of ground tissue were placed in 2 mL FastPrep tubes containing 1.4 mm  
125 ceramic spheres (Lysing Matrix D) and extracted with 1 mL of acidified aqueous solution of methanol  
126 (MeOH/H<sub>2</sub>O/HCOOH, 80:19:1). After two cycles of 20 seconds at 6 m/sec. in the FastPrep-24™ (MP  
127 Biomedicals™), the samples were centrifuged at 4°C and 10 000 rpm for 10 minutes. The supernatants  
128 were transferred into vials. An extraction blank and QC (Quality Control) were also done for  
129 extraction and analytical validation.

## 130 UHPLC-HRMS profiling

131 Ultra High Performance Liquid Chromatography-High Resolution MS (UHPLC-HRMS) analyses  
132 were performed on a Q Exactive Plus quadrupole mass spectrometer, equipped with a heated  
133 electrospray probe (HESI II) coupled to an U-HPLC Ultimate 3000 RSLC system (Thermo Fisher  
134 Scientific, Hemel Hempstead, UK). Samples were separated on a Luna Omega Polar C18 column  
135 (150×2.1mm i.d., 1.6µm, Phenomenex, Sartrouville, France) equipped with a guard column. The  
136 mobile phase A (MPA) was water with 0.05% formic acid (FA) and mobile phase B (MPB) was  
137 acetonitrile with 0.05% FA. The solvent gradient was: 0 min, 100% MPA; 1 min 100% MPA; 22 min,  
138 100% MPB; 25 min, 100% MPB, 25.5 min, 100% MPA; 28 min, 100% MPA. The flow rate was  
139 0.3 mL/min, the column temperature was set to 40°C, the autosampler temperature was set to 10°C  
140 and injection volume fixed to 2 µL for standard mixes and plant extracts. Mass detection was  
141 performed in positive ionization (PI) and negative ionization (NI) modes at 30 000 resolving power  
142 [full width at half maximum (FWHM) at 400 m/z] for MS1 and 17 500 for MS2 with an automatic  
143 gain control (AGC) target of 1e5. Ionization spray voltages were set to 3.5 kV (for PI) and 2.5 kV (for  
144 NI) and the capillary temperature was set to 256°C for both modes. The mass scanning range was  $m/z$   
145 70-1050 Da for standards and  $m/z$  100-1500 Da for plant extracts. Each full MS scan was followed by  
146 data-dependent acquisition of MS/MS data for the six most intense ions.

## 147 Data processing

148 LC-MS data were first processed with MS-DIAL version 4.12. MS1 and MS2 tolerances were set to  
149 0.01 and 0.05 Da, respectively, in centroid mode for each dataset. Peaks were aligned on a quality  
150 control (QC) reference file with a RT tolerance of 0.1 min and a mass tolerance of 0.015 Da.  
151 Minimum peak height was set to 70% below the observed total ion chromatogram (TIC) baseline for a  
152 blank injection. MS-DIAL data was cleaned with MS-CleanR by selecting all filters with a minimum  
153 blank ratio set to 0.8, a maximum relative standard deviation (RSD) set to 30 and a relative mass  
154 defect (RMD) ranging from 50-3 000. The maximum mass difference for feature relationships  
155 detection was set to 0.005 Da and maximum RT difference was set to 0.025 min. The Pearson  
156 correlation links were considered only for biological datasets with correlation  $\geq 0.8$  and statistically  
157 significant  $\alpha = 0.05$ . Two peaks were kept in each cluster: the most intense and the most connected.  
158 The kept features were annotated with MS-FINDER version 3.26. The MS1 and MS2 tolerances were  
159 set to 5 and 15 ppm, respectively. Formula finder were exclusively processed with C, H, O, N, P and S  
160 atoms. DBs based on the genus and the family of the plant species (Table S3, Table S4, Table S7,  
161 Table S8) being investigated were constituted with the dictionary of natural product (DNP-CRC press,  
162 DNP on DVD v. 28.2) and the internal generic databases used were KNApSAcK, PlantCyc, HMDB,  
163 LipidMaps, NANPDB and UNPD. Annotation prioritization was done by ranking genus DB followed  
164 by Family DB and then generic DB (internal DB from MS-FINDER).

## 165 Statistical analysis

166 Statistical analyses were done by using SIMCA-P+ (version 15.0.2, Umetrics, Umea, Sweden). All  
167 data were scaled by unit variance (UV) scaling before multivariate analysis. The orthogonal projection  
168 to latent structure using discriminant analysis (OPLS-DA) was used to separate data according to *A.*  
169 *thaliana* growing conditions. The OPLS regression model used for the *Medicago* datasets was tuned  
170 with line resistance as the Y input: the following resistance indices 0, 1 and 2 were respectively  
171 indicated for the F83, A17 and DZA45.5 strains. Coefficient scores were used to rank variables  
172 according to their class biomarker: a high coefficient indicating a strong correlation with resistance  
173 traits.

## 174 Mass spectral similarity network

175 The .msp NI and metadata files generated at the end of the MS-CleanR workflow were imported into  
176 MetGem<sup>25</sup> (version 1.2.2). A mass spectral similarity network was created with a cosine score cut off  
177 fixed at 0.65, a maximum of ten connections between nodes and at least four matched peaks. The  
178 resulting network was then imported into Cytoscape<sup>26</sup> (version 3.7.2) to tune visualization. Nodes  
179 were thus colored according to their annotated chemical classes and their sizes were indicated relative  
180 to the OPLS coefficient score. Edge width was deepened according to their cosine value.

## 181 RESULTS AND DISCUSSION

### 182 MS-CleanR Workflow and Implementation

183 Insert Figure 1

184 **Step 1: generic filters.** We first applied several generic filters to pre-clean the feature table of noise.  
185 Starting from the alignment result file exported from MS-DIAL, the ratio between the mean of blank  
186 samples and quality control (QC) samples (pool of all extracts) was calculated. All features exceeding  
187 the user-defined threshold for this 'blank ratio' were removed. The ratio was calculated by using the  
188 height of each feature because the normalized height can produce an increase in some blank signals.  
189 This filter is also available in MS-DIAL, but MS-CleanR provides additional options for filtering ion  
190 features. A second filter, called 'ghost blank peaks', is based on the high background ion drift we  
191 observed in blank injections and in other samples that had a significant retention time (RT) shift  
192 (Figure S1). These peaks had a low ratio of blank to sample class that excluded them from the usual  
193 blank filtering approach. A third generic filter is based on an 'unusual mass decimal'. When singly  
194 charged ions of basic organic molecules containing carbon, hydrogen, oxygen, and nitrogen are  
195 considered, ion features with a value of more than eight at the first decimal place of  $m/z$  (mass to  
196 charge ratio) are generally considered to be artifacts: this filter option can be disabled when working  
197 with exceptions (e.g., phosphorylated compounds). A fourth generic filtering approach is the 'relative

198 standard deviation' (RSD) among sample classes. A high RSD value highlights poor ionization  
199 repeatability. In our implementation, the RSD value was computed for each sample class and features  
200 were removed if the RSD values in all sample classes exceeded a user-defined threshold. This  
201 approach avoids incorrect feature deletions: in the case of large sample cohorts, for example, repeated  
202 QC injections usually result in large RSDs because of a high dilution effect in the samples. Finally, we  
203 introduced a fifth filter based on the 'relative mass defect' (RMD) calculation. The RMD is calculated  
204 in ppm as  $[(\text{mass defect}/\text{measured monoisotopic mass}) \times 10^6]$ . It can be used to filter compound  
205 classes<sup>23</sup> and it should also be useful to remove artifactual signals. Based on all compounds exported  
206 from the Dictionary of Natural Products (DNP; available on DVD v.28.2 from CRC Press), we found  
207 that 95% of natural products (NP)s had RMD values of 156.5-969.6 ppm. When this window was  
208 extended to 99% of NPs, the range of RMD values was 52.05-2902.9 ppm.

209 **Step 2: Feature clustering.** To improve further the filtering process, we implemented a features  
210 clustering function to be applied to those features remaining after the generic-based filtering described  
211 above. The main goal of this step is to select the features arising from a unique metabolite signal  
212 among each cluster by using the multi-level optimization of modularity algorithm<sup>28</sup>. Feature clustering  
213 is first based on the peak character estimation algorithm computed by MS-DIAL, which aggregates  
214 several possible relationships at the same RT range: ion correlation among samples, MS/MS fragments  
215 in higher  $m/z$ , possible adducts and chromatogram correlations<sup>22</sup>. Additionally, we also implemented  
216 an index of possible neutral loss and a calculation of dimers/heteromers to tag clustered feature  
217 relationships. Optionally, Pearson's correlation between features located in the same RT window  
218 (typically of 0.025 minutes) can be computed, the strong correlation links being then considered  
219 during the clustering process. If the study involves the same set of samples acquired both in PI and NI  
220 mode, the MScombine<sup>29</sup> tool, incorporated into MS-CleanR, can be used to detect possible links  
221 between positive and negative features appearing in the same RT window. This process corrects  
222 misidentified relationships to consider observed  $m/z$  differences acquired between both ion modes.  
223 The package can only treat PI or NI data independently, however. We observed that a unique  
224 metabolite signal in each cluster can be selected by: a PI/NI adduct link (e.g.  $[M+H]^+/[M-H]^-$ ,  
225  $[M+Na]^+/[M+FA-H]^-$ ; the most intense peak of the cluster, and the peak with the most relationships to  
226 other features (i.e. the highest 'degree' of connection). Among each cluster, one to  $n$  features (tunable  
227 by the user) can be selected for further annotation: the most intense, the most connected or both. The  
228 other features are removed from consideration.

229 **Step 3: Feature annotation.** After the above filtering steps, only a portion of the original features are  
230 exported to MS-FINDER, which greatly accelerate the processing time. This software computes  
231 feature annotations by querying internal DBs or imported DBs. Several DBs can be used to annotate a

232 single set of features by exporting the results for each DB used. Additionally, a “compound level”  
233 column can be added into external DBs to further prioritize annotation within each DB used.

234 **Step 4: Annotated peak list.** This final step selects for each feature the best annotation among match  
235 possibilities exported from MS-FINDER. In the case of multiple DB interrogation, the workflow  
236 allows compound annotations to be ranked based on MS-FINDER score only or by prioritizing certain  
237 DBs, depending on user choices. This latter function can greatly improve the annotation accuracy  
238 particularly when dealing with taxonomically defined extracts<sup>30</sup>. MS-CleanR can also prioritize  
239 compounds based on “Compound\_level” column tuned by the user in external DBs used for MS-  
240 FINDER annotation. Finally, the resulting annotated peaks list can be converted into an .msp format  
241 for mass spectral similarity networking as in GNPS<sup>31</sup> or MetGem<sup>25</sup> (for the detailed mathematics of the  
242 workflow, see Supporting Information Text 1).

#### 243 [Workflow benchmarking on pooled standards](#)

244 To validate our approach, we benchmarked the MS-CleanR workflow by using a mixture of 51 NPs  
245 standards profiled in NI and PI modes with a reverse phase column and a 25 minutes gradient. The  
246 resulting data were compiled in an in-house DB comprising RT, HRMS and MS/MS fragmentation  
247 patterns (DB-level 1 annotation according to the Metabolomics Standards Initiative-MSI<sup>32</sup>). To test  
248 whether the workflow retained features arising from unique metabolites and removed useless signals,  
249 we compared the results obtained by using a combination of MS-DIAL and MS-FINDER and DB-  
250 level 1 annotation to those obtained by using MS-CleanR. For the latter, we created another DB of the  
251 same metabolite set encompassing accurate mass, molecular formula and SMILES strings (DB-level 2  
252 annotation according to the MSI) to reproduce real-case annotation processing. All five generic filters  
253 were used and the two most intense and two most connected features within each cluster were  
254 exported for annotation by using the ‘formula prediction and structure elucidation by *in silico*  
255 fragmentation tool’ in MS-FINDER (Table S1).

256 

257 As anticipated, we observed significant feature inflation in this mixture of 51 NP standards: 869  
258 signals from PI and NI acquisition modes were detected (Figure 2). This approximately 95% feature  
259 inflation is consistent with a previous report of 10 000-30 000 features detected after injection of 900  
260 unique metabolites<sup>33</sup> and with a study that used isotope labeling as a feature filtering approach<sup>11</sup>. Blank  
261 ratio filtering deleted 50% of the features and the other generic filters described above removed 15%  
262 of the remaining ones. Feature clustering resulted in a further reduction of 18%, resulting in a total of  
263 115 features retained. Overall, the workflow filtered out 80% of all detected signals. By using this  
264 approach, there was a remarkable improvement in the annotation rate (unique metabolites/detected



265 features) from 5% to 45% (Figure 2). Consequently, 21 metabolites displayed an isolated  $m/z$ -RT  
266 signal whereas the others were grouped in clusters of two to eleven features (Figure 3A). Overall, 50  
267 metabolites were annotated, 44 of which matched perfectly with level 1 annotation DB (Table S1).  
268 The remaining ones were annotated as an isobaric/isomeric match because of prioritization of highest  
269 MS-FINDER scoring value (e.g., 4-Aminosalicylic acid and 5-Aminosalicylic acid). In the case of  
270 gramine, for example, the major pseudo-molecular ion had an  $m/z$  value of 130.06493 at RT 7.75  
271 minutes (Figure 3B). By applying feature clustering, we detected an in-source fragment corresponding  
272 to the neutral loss of the dimethylamine group at  $m/z$  130.0649. This feature was removed and only the  
273 signal at  $m/z$  103.054 and  $m/z$  175.1228 were exported for annotation. Since  $m/z$  175.1228 was the  
274 most intense peak, it was retained and annotated as gramine ( $\Delta\text{ppm}=0.4$ ) with a perfect match. The  
275 peak detected at RT 11.47 minutes was grouped in a cluster of 11 features, mainly related to similar  
276 MS/MS spectra. In this case, the PI and NI clusters were merged according to their detected adduct  
277 ( $[\text{M}+\text{H}]^+$  and  $[\text{M}-\text{H}]^-$ , respectively) and the feature with highest MS-Finder annotation score was  
278 retained in the final peak list and identified as neohesperidin dihydrochalcone ( $\Delta\text{ppm}=0.4$ ).  
279 Formononetin displayed complex adduct relationships in PI and NI modes and successive features  
280 with higher  $m/z$ 's MS/MS fragment of formononetin in PI mode. The merging of PI and NI modes  
281 allowed the main feature in this complex cluster to be selected and provided a perfect match with level  
282 1 annotation DB. The only mismatch was encountered for phloridzin due to the neutral loss of a  
283 glucose moiety in both in PI and NI modes. Only genine was detected in PI mode, resulting in  
284 selection of this signal in the final peak list.

285 Insert Figure 3

286 To model more closely a real biological sample, we standardized our workflow by using a mixture of  
287 167 standard compounds from the IROA Mass Spectrometry library (Table S2). As above, we found  
288 significant feature inflation: 6732 signals after concatenation of PI and NI datasets (Figure S2). Unlike  
289 the standardization with NPs, above, the generic filters removed only 15% of features. The most  
290 important improvement was obtained by feature clustering, which filtered out 90% of the detected  
291 features leaving 611 signals. Among these, 127 features were identified with a perfect match  
292 compared to Level-1 annotation DB and 21 were annotated as an isomeric match (Table S2). Twelve  
293 features were removed due to their co-elution with other compounds and four had a significant RT  
294 shift due to their poor peak shapes. The final three compounds were not annotated because of neutral  
295 loss of the same moiety in PI and NI modes, which led to their misidentification. Overall, the  
296 annotation rate with this workflow was 27% (Figure S2) and 90% of unique metabolites were retained.

## 297 Evaluation of MS-CleanR on biological samples

298 To evaluate the utility of the workflow on a real dataset, we set up an experiment to compare  
299 metabolome changes in *Arabidopsis thaliana* plants due to different culture conditions and age of the  
300 plants. Three cultural conditions were assessed (low density growth in Jiffy® pots for 32 days, high  
301 density growth in plastic pots for 21 days and hydroponic culture in liquid MS medium for 14 days)  
302 and 10 biological replicates were analyzed per culture condition. At harvest time, 4 leaves (2  
303 cotyledons and 2 leaves) were observed for hydroponic plants, the densely seeding plants showed not  
304 more than two small, but completed, developed leaves, while the jiffy growing plants harbored large  
305 and well developed rosette leaves. Extracts were made from the aerial parts of the plants grown in pots  
306 and from the roots and green tissues of plants in hydroponic culture, and the extracts were profiled by  
307 LC-MS. The datasets acquired in PI and NI modes were treated by using the MS-CleanR workflow  
308 with default parameters (see Methods). Sequential principal component analysis (PCA) was used to  
309 provide an unsupervised overview of the LC-MS fingerprints resulting from the generic filters and  
310 feature clustering (Figure 4). The PCA score plot of raw PI and NI mode data displayed 51% of total  
311 explained variance using the first two principal components. QC samples appeared in the center of the  
312 PCA score plot, demonstrating the reproducibility of the LC-MS analysis. As expected, the youngest  
313 plants growing hydroponically were completely separate on the first principal component (PC1) axis  
314 from the older plants growing in pots. The plants growing in Jiffy pots and plastic pots could not be  
315 distinguished in the raw dataset. After the generic filter step, the data from these latter two conditions  
316 formed more distinct clusters, the total explained variance was slightly improved at 58% and the  
317 number of features decreased by 35% (Figure 4). After the feature clustering step, the number of  
318 features was reduced by 80%. All datasets were annotated with in-lab DB (level 1) and with MS-  
319 FINDER (level 2) by reference to external DBs of *Arabidopsis* (Table S3) and Brassicaceae  
320 compounds (Table S4) and an internal MS-FINDER plant-related DB (comprising PlantCyc,  
321 KNApSAcK, HMDB, LIPID MAPS and UNPD). In the raw PI and NI dataset exported from MS-  
322 DIAL (1163 features), 42% of all features were annotated, 26% of them appeared in the *Arabidopsis*  
323 DB, 2% in the Brassicaceae DB, 7% in the internal MS-FINDER DBs and 6% with in-lab DB (Figure  
324 4); 58% of all features were unidentified. The generic filters removed 15% of all features and  
325 increased the annotation rate to 59%. Feature clustering drastically reduced the number of features  
326 ( $254 m/z \times RT$  pairs) and increased the annotation rate to 73%. Using annotation DB prioritization,  
327 53% of retained features were annotated in *Arabidopsis* genus and 13% at level 1 with in-lab DB, only  
328 27% remained unidentified. Orthogonal projections to latent structures discriminant analysis (OPLS-  
329 DA) of the most highly ranked features identified three amino acids (oxoproline, citrulline and  
330 glutamine) that discriminate between growth in pots and hydroponic growth (Table S5). This may be  
331 related to differences in nitrogen availability in the hydroponics medium and in potting soil.

332

Insert Figure 4

333

### 334 Metabolic profiling with MS-CleanR

335 Untargeted metabolomic profiling has emerged as a method of choice to identify metabolic markers  
336 associated with beneficial traits in plants, such as resistance to biotic stresses. In this context, the MS-  
337 CleanR workflow could greatly improve the results of untargeted metabolomics. To illustrate this  
338 point, we used as a model the legume *Medicago truncatula* and the pathogenic oomycete  
339 *Aphanomyces euteiches*, a major pathogen of several legume species<sup>34</sup>. Genome-wide association  
340 studies of 179 lines of *M. truncatula* have identified major loci involved in the resistance of the plant  
341 to *A. euteiches*. Moreover, genes encoding enzymes involved in the synthesis of antimicrobial  
342 metabolites are expressed in uninfected plants<sup>35</sup>. This suggests that antimicrobial metabolites in  
343 uninfected plants may be useful biomarkers with which to select legumes lines resistant to *A.*  
344 *euteiches*. To identify these metabolites, we applied the MS-CleanR workflow to analyze the  
345 metabolomes of roots from three different strains of *M. truncatula* that have different levels of  
346 resistance to *A. euteiches* infection: strain DZA45.5 has the highest level of resistance, A17 an  
347 intermediate level, and F83 is the most susceptible<sup>36</sup>. These three strains were analyzed by LC-MS in  
348 NI mode and potential biomarkers were highlighted by multivariate data analysis (Table S6). The  
349 metabolites that were differentially produced in the two most resistant strains (A17 and DZA45.5)  
350 when compared to the more sensitive one (F83) were identified by OPLS regression.

351

Insert Figure 5

352 After application of the MS-CleanR workflow, the PCA score plot showed a net clustering of the  
353 samples from each strain of *M. truncatula*. QC samples were centered on the PCA plot demonstrating  
354 very good reproducibility (Figure 5). When annotated by reference to DBs from *Medicago* or the  
355 legume family Fabaceae, 60% of the dataset was annotated (Figure 5) and an additional 9% with MS-  
356 FINDER DBs. A molecular spectral similarity network was built to highlight common chemical class  
357 related to resistance traits (Figure 6). Among all annotated features, flavonoids and terpene glycosides  
358 compounds were prevalent. This latter class encompass mostly triterpene sapogenins which appeared  
359 to be highly correlated to the resistance traits according to the OPLS regression model. In particular,  
360 the four top ranked compounds belonged to two clusters related to sapogenins and one to flavonoids.  
361 Our untargeted approach revealed the presence of Apigenin-7-O-glucuronopyranoside (best MS-  
362 FINDER score among several possible match in flavonoid class) only in the resistant DZ45.5 strain.  
363 This result corroborated a previous study by our group which demonstrated the implication of  
364 flavonoid pathway in resistance<sup>35</sup>. However, other detected flavonoids were not correlated to the  
365 resistance contrary to sapogenins class. Among the 151 terpene glycosides annotated in this study, 36  
366 were also identified by a large-scale sapogenin profiling study in various ecotypes of *M. truncatula*<sup>37</sup>  
367 (Table S6). Interestingly, the three-top ranked sapogenins by OPLS model (Azukisaponin III,

368 Arjunolic acid 3-glucoside and Soyasaponin I) displayed an isobaric match with tow hederagenin  
369 glycoside and a bayogenin derivatives respectively annotated by Sumner and colleagues. These  
370 saponin accumulates preferentially in roots than in leaves. These organs, however, have distinct  
371 profiles of specific saponins, which may be explained by the adaptation of each ecotype to its biotic  
372 environment. A previous study, for example, showed that saponins derived from hederagenin  
373 glycoside in *M. truncatula* have antifungal activity<sup>38</sup>. Our study confirmed a higher level of these  
374 compounds in the strains resistant to *A. euteiches* (DZA45.5 and A17) than it is in the sensitive strain  
375 F83. Although the relevance of saponins to resistance of *M. truncatula* to *A. euteiches* remains to be  
376 confirmed, these findings demonstrate the potential value of applying metabolomics tools to identify  
377 biomarkers of plant resistance.

378 Insert Figure 6

## 379 CONCLUSIONS

380 The main goal of LC-MS-based untargeted metabolomics is to convert chromatographic profiles of  
381 complex biological extracts into a comprehensive metabolite list. Professor Ian Wilson summarized  
382 the challenge thus: “LC-MS includes everything, which means you see everything. Thus, the challenge  
383 is to take oceans of data, and make rivers of information, and finally puddles of knowledge.” (NIH  
384 Metabolomics symposium, August 2013). We demonstrate here that feature degeneracy - the ocean of  
385 data - has a great impact on the final annotated peak list information, thus impacting the biological  
386 knowledge mined from untargeted metabolomic studies. We estimate, based on analysis of standard  
387 mixtures, that feature inflation is close to 95%, in agreement with other studies<sup>33,11</sup>. Our package MS-  
388 CleanR, with its a point-and-click software on a Shiny interface, is a new component in the suite of  
389 tools comprising the GUI software MS-DIAL and the annotation capabilities of MS-FINDER which  
390 altogether provide a comprehensive workflow, from raw data to final annotated peaklist. MS-CleanR  
391 can reduce the number of features by 80-90% and keep most unique metabolite signals without  
392 compromising the final data structure. The opportunity to rank the annotation results with reference to  
393 in-house databases narrows down the final identification possibilities. Additionally, the package is  
394 able to combine both PI and NI mode (*A. thaliana* experiment) or to treat only one mode (*M.*  
395 *truncatula* study) depending of the study objectives. We demonstrate the utility of this workflow by  
396 analyzing secondary metabolites levels in three *M. truncatula* strains with different susceptibilities to a  
397 pathogenic oomycete. We could annotate 70% of the dataset with 60% at the genus or family level  
398 using DBs prioritization. The resulting mass spectral similarity network further supports annotation  
399 results since most clusters gathered the same metabolite chemical class. Still, our approach was unable  
400 to keep only unique metabolite features regarding the annotation rate comprising between 24 and 45%  
401 for standard mixtures. A limitation of our filtering process is its dependence to chromatographic

402 resolution, which can seriously impair the final results by clustering several unique metabolites  
403 together. In the present study, we chose a twenty minutes gradient, like those generally applied in most  
404 untargeted metabolomics studies. Extending the elution time might improve the chromatographic  
405 resolution but is difficult to apply in day-to-day work, especially for high-throughput experiments.  
406 These challenges will be addressed in future developments of MS-CleanR.

407

## 408 ASSOCIATED CONTENT

409 The Supporting Information is available free of charge on...

- 410 • figure S1. Alignment spot screenshot in ESI PI and NI ionization modes showing repeated  
411 blank pseudomolecular ions detected massively in QCs samples with a retention time shift.  
412 (PDF)
- 413 • Figure S2. Features filtering of LC-MS dataset from 167 IROA-MS standards library  
414 according to generic filters and clustering algorithm. Barplot display feature counts after  
415 successive filters. Line plot display annotation rate (unique metabolites/feature counts in %).  
416 (PDF)
- 417 • Sup Table S1: Excel table with cluster annotation, result summary and database for level 2  
418 annotation imported in MS-FINDER for the 51 NPs dataset (XLSX)
- 419 • Sup Table S2: Excel table with cluster annotation, result summary and database for level 2  
420 annotation imported in MS-FINDER for the 167 IROA MS standard library dataset (XLSX)
- 421 • Sup Table S3: Arabidopsis DB used as input for level 2 annotation in MS-FINDER (TXT)
- 422 • Sup Table S4: Brassicaceae DB used as input for level 2 annotation in MS-FINDER (TXT)
- 423 • Sup Table S5: Arabidopsis dataset treated by MS-CleanR and OPLS-DA top ranked features  
424 (XLSX)
- 425 • Sup Table S6: Medicago dataset treated by MS-CleanR and OPLS regression coefficient for  
426 feature ranking (XLSX)
- 427 • Sup Table S7: Medicago DB used as input for level 2 annotation in MS-FINDER (TXT)
- 428 • Sup Table S8: Fabaceae DB used as input for level 2 annotation in MS-FINDER (TXT)
- 429 • Raw data from *Arabidopsis* and *Medicago* LC-MS profiling available on Zenodo using the  
430 DOI: 10.5281/zenodo.3744480

## 431 AUTHOR INFORMATION

432 Corresponding author  
433 Phone: (+33) 534 32 38 31; mail: [guillaume.marti@univ-tlse3.fr](mailto:guillaume.marti@univ-tlse3.fr)  
434 ORCID : <https://orcid.org/0000-0002-6321-9005>

435

## 436 ACKNOWLEDGMENTS

437 We thank Dr. Stephane Bertani for providing us standards from the IROA-MS Library. Financial  
438 support from The French national infrastructure for metabolomics and fluxomics, MetaboHUB-ANR-  
439 11-INBS-0010 and PSPC Solstice project supported by Bpifrance (SOLutionS for Integrates  
440 Treatments under Environmental Management). We thank E Amblard, N. Jariais and C. Jacquet for *M.*  
441 *truncatula* cultures and A. Haouy for *A. thalina* cultures and sample preparations. We also  
442 acknowledge Carol Featherstone of Plume Scientific Communication Services for professional  
443 scientific editing.

## 444 References

445

- 446 (1) Zierer, J.; Jackson, M. A.; Kastenmüller, G.; Mangino, M.; Long, T.; Telenti, A.;  
447 Mohney, R. P.; Small, K. S.; Bell, J. T.; Steves, C. J.; Valdes, A. M.; Spector, T. D.;  
448 Menni, C. The Fecal Metabolome as a Functional Readout of the Gut Microbiome. *Nat.*  
449 *Genet.* **2018**, *50* (6), 790-795. <https://doi.org/10.1038/s41588-018-0135-7>.
- 450 (2) Li, H.; Ning, S.; Ghandi, M.; Kryukov, G. V.; Gopal, S.; Deik, A.; Souza, A.; Pierce,  
451 K.; Keskula, P.; Hernandez, D.; Ann, J.; Shkoza, D.; Apfel, V.; Zou, Y.; Vazquez, F.;  
452 Barretina, J.; Pagliarini, R. A.; Galli, G. G.; Root, D. E.; Hahn, W. C.; Tsherniak, A.;  
453 Giannakis, M.; Schreiber, S. L.; Clish, C. B.; Garraway, L. A.; Sellers, W. R. The  
454 Landscape of Cancer Cell Line Metabolism. *Nat. Med.* **2019**, *25* (5), 850-860.  
455 <https://doi.org/10.1038/s41591-019-0404-8>.
- 456 (3) Gargallo-Garriga, A.; Sardans, J.; Pérez-Trujillo, M.; Oravec, M.; Urban, O.; Jentsch,  
457 A.; Kreyling, J.; Beierkuhnlein, C.; Parella, T.; Peñuelas, J. Warming Differentially  
458 Influences the Effects of Drought on Stoichiometry and Metabolomics in Shoots and  
459 Roots. *New Phytol.* **2015**, *207* (3), 591-603. <https://doi.org/10.1111/nph.13377>.
- 460 (4) Mohimani, H.; Gurevich, A.; Shlemov, A.; Mikheenko, A.; Korobeynikov, A.; Cao, L.;  
461 Shcherbin, E.; Nothias, L.-F.; Dorrestein, P. C.; Pevzner, P. A. Dereplication of  
462 Microbial Metabolites through Database Search of Mass Spectra. *Nat. Commun.* **2018**,  
463 *9* (1). <https://doi.org/10.1038/s41467-018-06082-8>.
- 464 (5) Wang, S.; Alseekh, S.; Fernie, A. R.; Luo, J. The Structure and Function of Major Plant  
465 Metabolite Modifications. *Mol. Plant* **2019**, *12* (7), 899-919.  
466 <https://doi.org/10.1016/j.molp.2019.06.001>.
- 467 (6) Huan, T.; Forsberg, E. M.; Rinehart, D.; Johnson, C. H.; Ivanisevic, J.; Benton, H. P.;  
468 Fang, M.; Aisporna, A.; Hilmers, B.; Poole, F. L.; Thorgersen, M. P.; Adams, M. W.  
469 W.; Krantz, G.; Fields, M. W.; Robbins, P. D.; Niedernhofer, L. J.; Ideker, T.;  
470 Majumder, E. L.; Wall, J. D.; Rattray, N. J. W.; Goodacre, R.; Lairson, L. L.; Siuzdak,  
471 G. Systems Biology Guided by XCMS Online Metabolomics. *Nat Meth* **2017**, *14* (5),  
472 461-462.
- 473 (7) Giacomoni, F.; Le Corguille, G.; Monsoor, M.; Landi, M.; Pericard, P.; Petera, M.;  
474 Duperier, C.; Tremblay-Franco, M.; Martin, J.-F.; Jacob, D.; Goulitquer, S.; Thevenot,

- 475 E. A.; Caron, C. Workflow4Metabolomics: A Collaborative Research Infrastructure for  
476 Computational Metabolomics. *Bioinformatics* **2015**, *31* (9), 1493-1495.  
477 <https://doi.org/10.1093/bioinformatics/btu813>.
- 478 (8) Pluskal, T.; Castillo, S.; Villar-Briones, A.; Orešič, M. MZmine 2: Modular Framework  
479 for Processing, Visualizing, and Analyzing Mass Spectrometry-Based Molecular  
480 Profile Data. *BMC Bioinformatics* **2010**, *11* (1), 1.
- 481 (9) Tsugawa, H.; Cajka, T.; Kind, T.; Ma, Y.; Higgins, B.; Ikeda, K.; Kanazawa, M.;  
482 VanderGheynst, J.; Fiehn, O.; Arita, M. MS-DIAL: Data-Independent MS/MS  
483 Deconvolution for Comprehensive Metabolome Analysis. *Nat. Methods* **2015**, *12* (6),  
484 523-526. <https://doi.org/10.1038/nmeth.3393>.
- 485 (10) Patti, G. J.; Yanes, O.; Siuzdak, G. Metabolomics: The Apogee of the Omics Trilogy.  
486 *Nat. Rev. Mol. Cell Biol.* **2012**, *13* (4), 263-269. <https://doi.org/10.1038/nrm3314>.
- 487 (11) Mahieu, N. G.; Patti, G. J. Systems-Level Annotation of a Metabolomics Data Set  
488 Reduces 25 000 Features to Fewer than 1000 Unique Metabolites. *Anal. Chem.* **2017**,  
489 *89* (19), 10397-10406. <https://doi.org/10.1021/acs.analchem.7b02380>.
- 490 (12) Dührkop, K.; Fleischauer, M.; Ludwig, M.; Aksenov, A. A.; Melnik, A. V.; Meusel,  
491 M.; Dorrestein, P. C.; Rousu, J.; Böcker, S. SIRIUS 4: A Rapid Tool for Turning  
492 Tandem Mass Spectra into Metabolite Structure Information. *Nat. Methods* **2019**, *16*  
493 (4), 299-302. <https://doi.org/10.1038/s41592-019-0344-8>.
- 494 (13) Tsugawa, H.; Kind, T.; Nakabayashi, R.; Yukihira, D.; Tanaka, W.; Cajka, T.; Saito,  
495 K.; Fiehn, O.; Arita, M. Hydrogen Rearrangement Rules: Computational MS/MS  
496 Fragmentation and Structure Elucidation Using MS-FINDER Software. *Anal. Chem.*  
497 **2016**. <https://doi.org/10.1021/acs.analchem.6b00770>.
- 498 (14) Ruttkies, C.; Schymanski, E. L.; Wolf, S.; Hollender, J.; Neumann, S. MetFrag  
499 Relaunch: Incorporating Strategies beyond in Silico Fragmentation. *J.*  
500 *Cheminformatics* **2016**, *8* (1), 3. <https://doi.org/10.1186/s13321-016-0115-9>.
- 501 (15) Djoumbou-Feunang, Y.; Pon, A.; Karu, N.; Zheng, J.; Li, C.; Arndt, D.; Gautam, M.;  
502 Allen, F.; Wishart, D. S. CFM-ID 3.0: Significantly Improved ESI-MS/MS Prediction  
503 and Compound Identification. *Metabolites* **2019**, *9* (4), 72.  
504 <https://doi.org/10.3390/metabo9040072>.
- 505 (16) Kuhl, C.; Tautenhahn, R.; Böttcher, C.; Larson, T. R.; Neumann, S. CAMERA: An  
506 Integrated Strategy for Compound Spectra Extraction and Annotation of Liquid  
507 Chromatography/Mass Spectrometry Data Sets. *Anal. Chem.* **2012**, *84* (1), 283-289.  
508 <https://doi.org/10.1021/ac202450g>.
- 509 (17) Broeckling, C. D.; Afsar, F. A.; Neumann, S.; Ben-Hur, A.; Prenni, J. E. RAMClust: A  
510 Novel Feature Clustering Method Enables Spectral-Matching-Based Annotation for  
511 Metabolomics Data. *Anal. Chem.* **2014**, *86* (14), 6812-6817.  
512 <https://doi.org/10.1021/ac501530d>.
- 513 (18) DeFelice, B. C.; Mehta, S. S.; Samra, S.; Čajka, T.; Wancewicz, B.; Fahrman, J. F.;  
514 Fiehn, O. Mass Spectral Feature List Optimizer (MS-FLO): A Tool To Minimize False  
515 Positive Peak Reports in Untargeted Liquid Chromatography-Mass Spectroscopy (LC-  
516 MS) Data Processing. *Anal. Chem.* **2017**, *89* (6), 3250-3255.  
517 <https://doi.org/10.1021/acs.analchem.6b04372>.

- 518 (19) Mahieu, N. G.; Spalding, J. L.; Gelman, S. J.; Patti, G. J. Defining and Detecting  
519 Complex Peak Relationships in Mass Spectral Data: The Mz.Unity Algorithm. *Anal.*  
520 *Chem.* **2016**. <https://doi.org/10.1021/acs.analchem.6b01702>.
- 521 (20) Kantz, E.; Tiwari, S.; Watrous, J. D.; Cheng, S.; Jain, M. Deep Neural Networks for  
522 Classification of LC-MS Spectral Peaks. *Anal. Chem.* **2019**, *acs.analchem.9b02983*.  
523 <https://doi.org/10.1021/acs.analchem.9b02983>.
- 524 (21) Melnikov, A. D.; Tsentalovich, Y. P.; Yanshole, V. V. Deep Learning for the Precise  
525 Peak Detection in High-Resolution LC-MS Data. *Anal. Chem.* **2020**, *92* (1), 588-592.  
526 <https://doi.org/10.1021/acs.analchem.9b04811>.
- 527 (22) Tsugawa, H.; Nakabayashi, R.; Mori, T.; Yamada, Y.; Takahashi, M.; Rai, A.;  
528 Sugiyama, R.; Yamamoto, H.; Nakaya, T.; Yamazaki, M.; Kooke, R.; Bac-Molenaar, J.  
529 A.; Oztolan-Erol, N.; Keurentjes, J. J. B.; Arita, M.; Saito, K. A Cheminformatics  
530 Approach to Characterize Metabolomes in Stable-Isotope-Labeled Organisms. *Nat.*  
531 *Methods* **2019**, *16* (4), 295-298. <https://doi.org/10.1038/s41592-019-0358-2>.
- 532 (23) Salem, M. A.; Jüppner, J.; Bajdzienko, K.; Giavalisco, P. Protocol: A Fast,  
533 Comprehensive and Reproducible One-Step Extraction Method for the Rapid  
534 Preparation of Polar and Semi-Polar Metabolites, Lipids, Proteins, Starch and Cell Wall  
535 Polymers from a Single Sample. *Plant Methods* **2016**, *12* (1), 45.  
536 <https://doi.org/10.1186/s13007-016-0146-2>.
- 537 (24) BÉCARD, G.; FORTIN, J. A. Early Events of Vesicular-Arbuscular Mycorrhiza  
538 Formation on Ri T-DNA Transformed Roots. *New Phytol.* **1988**, *108* (2), 211-218.  
539 <https://doi.org/10.1111/j.1469-8137.1988.tb03698.x>.
- 540 (25) Olivon, F.; Elie, N.; Grelier, G.; Roussi, F.; Litaudon, M.; Touboul, D. MetGem  
541 Software for the Generation of Molecular Networks Based on T-SNE Algorithm. *Anal.*  
542 *Chem.* **2018**. <https://doi.org/10.1021/acs.analchem.8b03099>.
- 543 (26) Shannon, P. Cytoscape: A Software Environment for Integrated Models of  
544 Biomolecular Interaction Networks. *Genome Res.* **2003**, *13* (11), 2498-2504.  
545 <https://doi.org/10.1101/gr.1239303>.
- 546 (27) Ekanayaka, E. A. P.; Celiz, M. D.; Jones, A. D. Relative Mass Defect Filtering of Mass  
547 Spectra: A Path to Discovery of Plant Specialized Metabolites. *Plant Physiol.* **2015**,  
548 pp.114.251165. <https://doi.org/10.1104/pp.114.251165>.
- 549 (28) Blondel, V. D.; Guillaume, J.-L.; Lambiotte, R.; Lefebvre, E. Fast Unfolding of  
550 Communities in Large Networks. *J. Stat. Mech. Theory Exp.* **2008**, *2008* (10), P10008.  
551 <https://doi.org/10.1088/1742-5468/2008/10/p10008>.
- 552 (29) Calderón-Santiago, M.; Fernández-Peralbo, M. A.; Priego-Capote, F.; Luque de Castro,  
553 M. D. MSCombine: A Tool for Merging Untargeted Metabolomic Data from High-  
554 Resolution Mass Spectrometry in the Positive and Negative Ionization Modes.  
555 *Metabolomics* **2016**, *12* (3). <https://doi.org/10.1007/s11306-016-0970-4>.
- 556 (30) Rutz, A.; Dounoue-Kubo, M.; Ollivier, S.; Bisson, J.; Bagheri, M.; Saesong, T.;  
557 Ebrahimi, S. N.; Ingkaninan, K.; Wolfender, J.-L.; Allard, P.-M. Taxonomically  
558 Informed Scoring Enhances Confidence in Natural Products Annotation. *Front. Plant*  
559 *Sci.* **2019**, *10*, 1329. <https://doi.org/10.3389/fpls.2019.01329>.
- 560 (31) Nothias, L. F.; Petras, D.; Schmid, R.; Dührkop, K.; Rainer, J.; Sarvepalli, A.;  
561 Protsyuk, I.; Ernst, M.; Tsugawa, H.; Fleischauer, M.; Aicheler, F.; Aksenov, A.; Alka,  
562 O.; Allard, P.-M.; Barsch, A.; Cachet, X.; Caraballo, M.; Da Silva, R. R.; Dang, T.;



- 563 Garg, N.; Gauglitz, J. M.; Gurevich, A.; Isaac, G.; Jarmusch, A. K.; Kamenik, Z.;  
564 Kang, K. B.; Kessler, N.; Koester, I.; Korf, A.; Gouellec, A. L.; Ludwig, M.; Christian,  
565 M. H.; McCall, L.-I.; McSayles, J.; Meyer, S. W.; Mohimani, H.; Morsy, M.; Moyne,  
566 O.; Neumann, S.; Neuweger, H.; Nguyen, N. H.; Nothias-Esposito, M.; Paolini, J.;  
567 Phelan, V. V.; Pluskal, T.; Quinn, R. A.; Rogers, S.; Shrestha, B.; Tripathi, A.; van der  
568 Hooft, J. J. J.; Vargas, F.; Weldon, K. C.; Witting, M.; Yang, H.; Zhang, Z.; Zubeil, F.;  
569 Kohlbacher, O.; Böcker, S.; Alexandrov, T.; Bandeira, N.; Wang, M.; Dorrestein, P. C.  
570 *Feature-Based Molecular Networking in the GNPS Analysis Environment*; preprint;  
571 Bioinformatics, 2019. <https://doi.org/10.1101/812404>.
- 572 (32) Creek, D. J.; Dunn, W. B.; Fiehn, O.; Griffin, J. L.; Hall, R. D.; Lei, Z.; Mistrik, R.;  
573 Neumann, S.; Schymanski, E. L.; Sumner, L. W.; Trengove, R.; Wolfender, J.-L.  
574 Metabolite Identification: Are You Sure? And How Do Your Peers Gauge Your  
575 Confidence? *Metabolomics* **2014**, *10* (3), 350-353. [https://doi.org/10.1007/s11306-014-](https://doi.org/10.1007/s11306-014-0656-8)  
576 0656-8.
- 577 (33) Li, Z.; Lu, Y.; Guo, Y.; Cao, H.; Wang, Q.; Shui, W. Comprehensive Evaluation of  
578 Untargeted Metabolomics Data Processing Software in Feature Detection,  
579 Quantification and Discriminating Marker Selection. *Anal. Chim. Acta* **2018**, *1029*, 50-  
580 57. <https://doi.org/10.1016/j.aca.2018.05.001>.
- 581 (34) Gaulin, E.; Jacquet, C.; Bottin, A.; Dumas, B. Root Rot Disease of Legumes Caused by  
582 *Aphanomyces Euteiches*. *Mol. Plant Pathol.* **2007**, *8* (5), 539-548.  
583 <https://doi.org/10.1111/j.1364-3703.2007.00413.x>.
- 584 (35) Badis, Y.; Bonhomme, M.; Lafitte, C.; Huguet, S.; Balzergue, S.; Dumas, B.; Jacquet,  
585 C. Transcriptome Analysis Highlights Preformed Defences and Signalling Pathways  
586 Controlled by the *PrAe1* Quantitative Trait Locus (QTL), Conferring Partial Resistance  
587 to *Aphanomyces Euteiches* in *Medicago Truncatula*: Molecular Mechanisms Controlled  
588 by the *PrAe1* QTL. *Mol. Plant Pathol.* **2015**, *16* (9), 973-986.  
589 <https://doi.org/10.1111/mpp.12253>.
- 590 (36) Bonhomme, M.; André, O.; Badis, Y.; Ronfort, J.; Burgarella, C.; Chantret, N.;  
591 Prospero, J.-M.; Briskine, R.; Mudge, J.; Debéllé, F.; Navier, H.; Miteul, H.; Hajri, A.;  
592 Baranger, A.; Tiffin, P.; Dumas, B.; Pilet-Nayel, M.-L.; Young, N. D.; Jacquet, C.  
593 High-Density Genome-Wide Association Mapping Implicates an F-Box Encoding  
594 Gene in *Medicago Truncatula* Resistance to *Aphanomyces Euteiches*. *New Phytol.*  
595 **2014**, *201* (4), 1328-1342. <https://doi.org/10.1111/nph.12611>.
- 596 (37) Lei, Z.; Watson, B. S.; Huhman, D.; Yang, D. S.; Sumner, L. W. Large-Scale Profiling  
597 of Saponins in Different Ecotypes of *Medicago Truncatula*. *Front. Plant Sci.* **2019**, *10*.  
598 <https://doi.org/10.3389/fpls.2019.00850>.
- 599 (38) Abbruscato, P.; Tosi, S.; Crispino, L.; Biazzini, E.; Menin, B.; Picco, A. M.; Pecetti, L.;  
600 Avato, P.; Tava, A. Triterpenoid Glycosides from *Medicago Sativa* as Antifungal  
601 Agents against *Pyricularia Oryzae*. *J. Agric. Food Chem.* **2014**, *62* (46), 11030-11036.  
602 <https://doi.org/10.1021/jf5049063>.

603

604

605

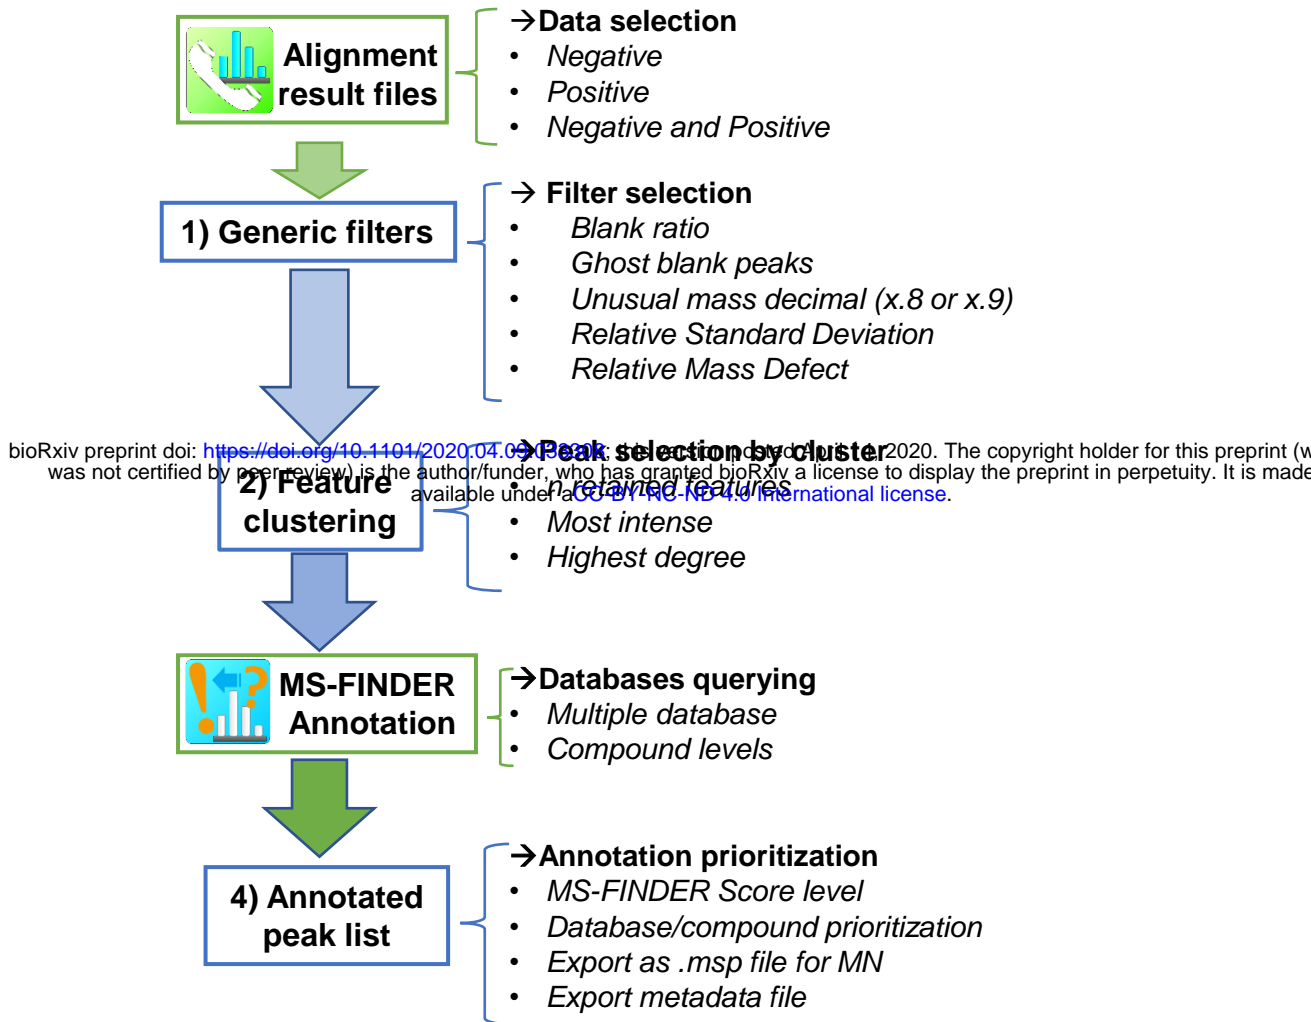

**Figure 1:** MS-CleanR workflow. Description of each step in the Shiny user interface workflow and the options available at each step. (MN, mass spectral similarity networking)

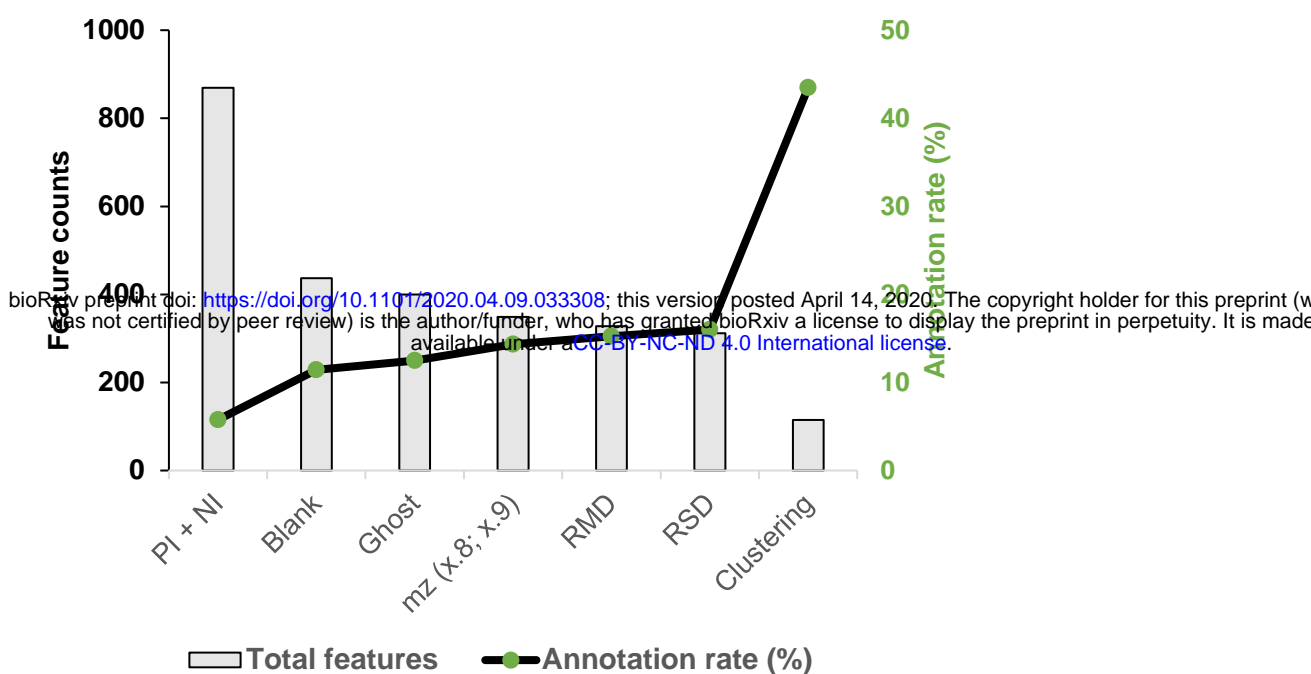

**Figure 2.** Feature filtering of the LC-MS dataset from 51 NPs standards. Generic filters and the feature clustering algorithm were applied to the initial PI + NI mode dataset. The bar plot displays feature counts after successive filters. The line plot displays annotation rate (unique metabolites/feature counts in %).

## A) Features clustering

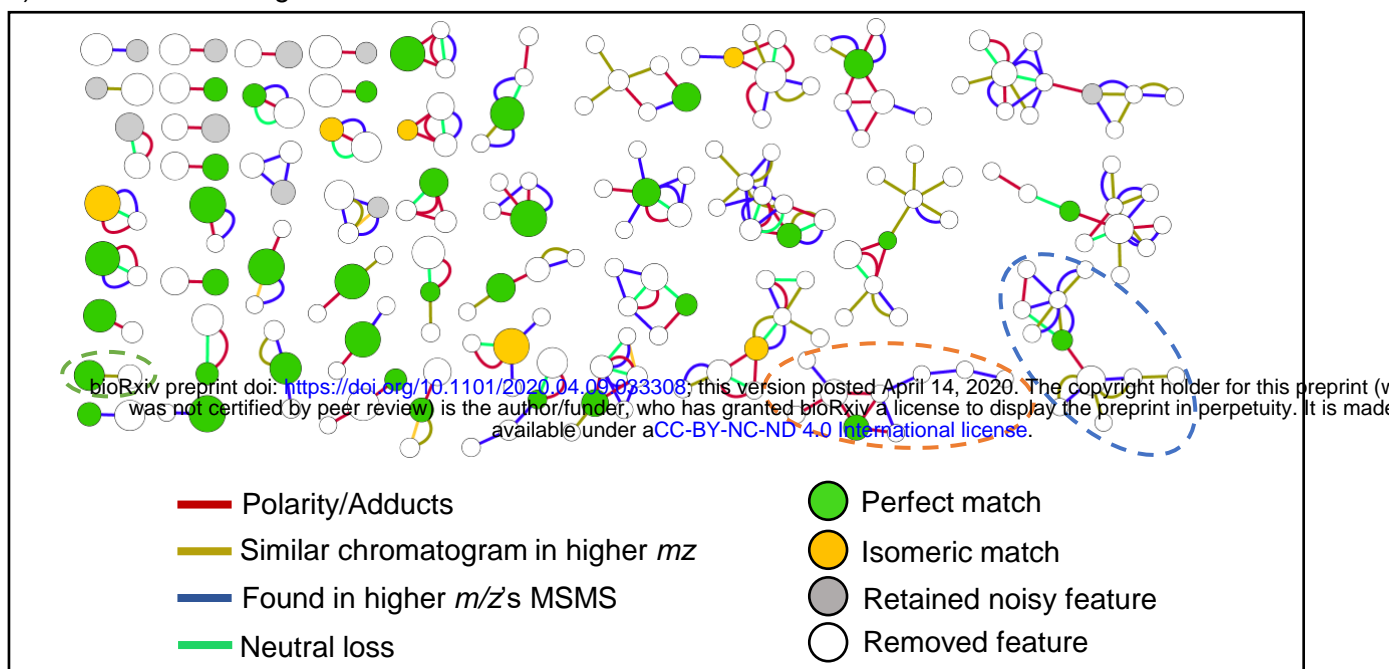

## B) LC-MS chromatograms of 51 NPs

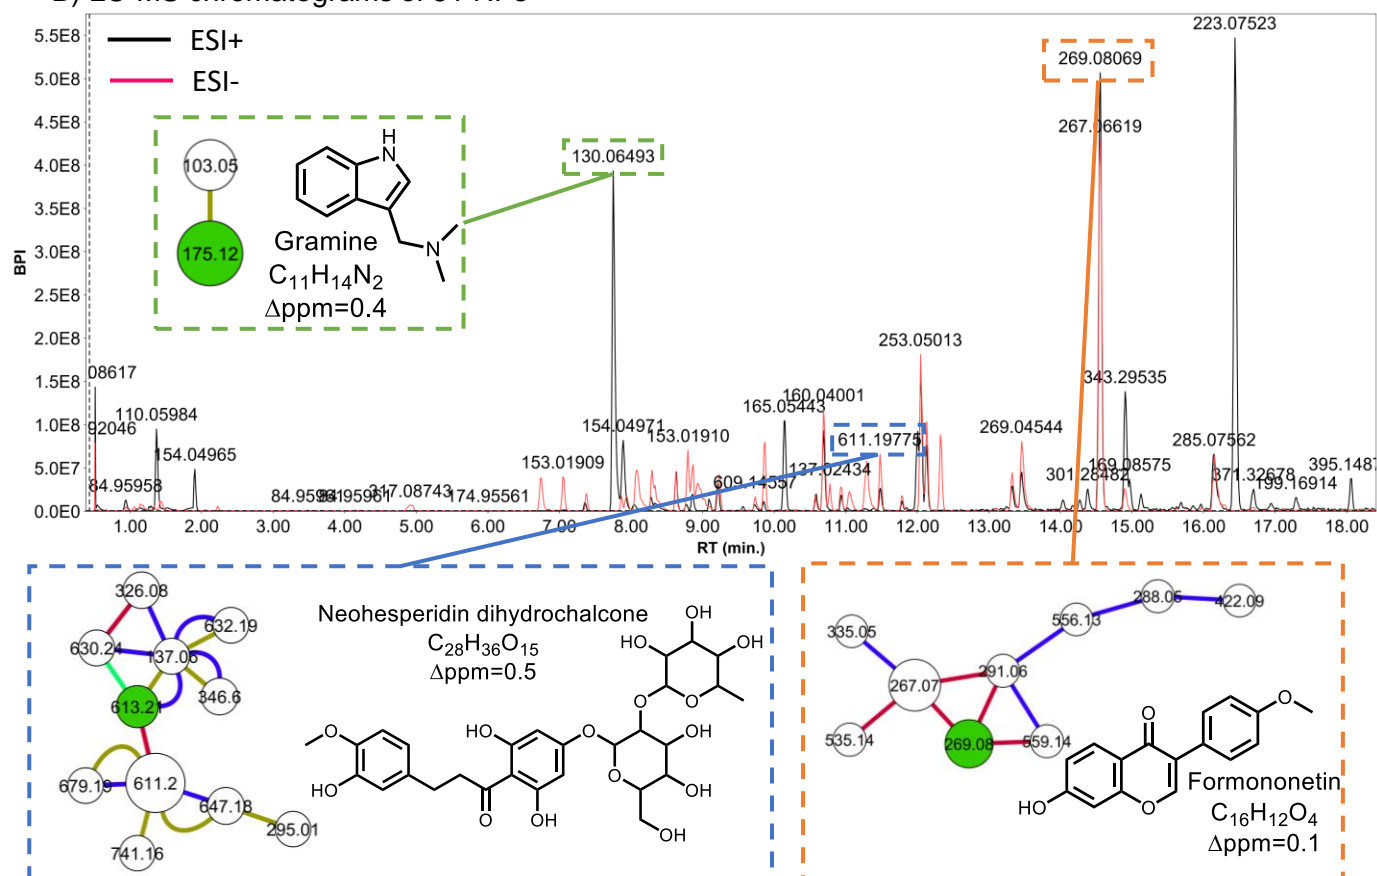

**Figure 3.** MS-CleanR feature clustering of 51 NPs. Clustering was based on the peak character estimation and multi-level optimization of modularity algorithms. A) Cluster plot of the whole dataset excluding size one clusters. B) UHPLC-HRMS base peak intensity (BPI) chromatogram of the standards mixture containing 51 NPs. Three representative compounds and their respective clusters are indicated.

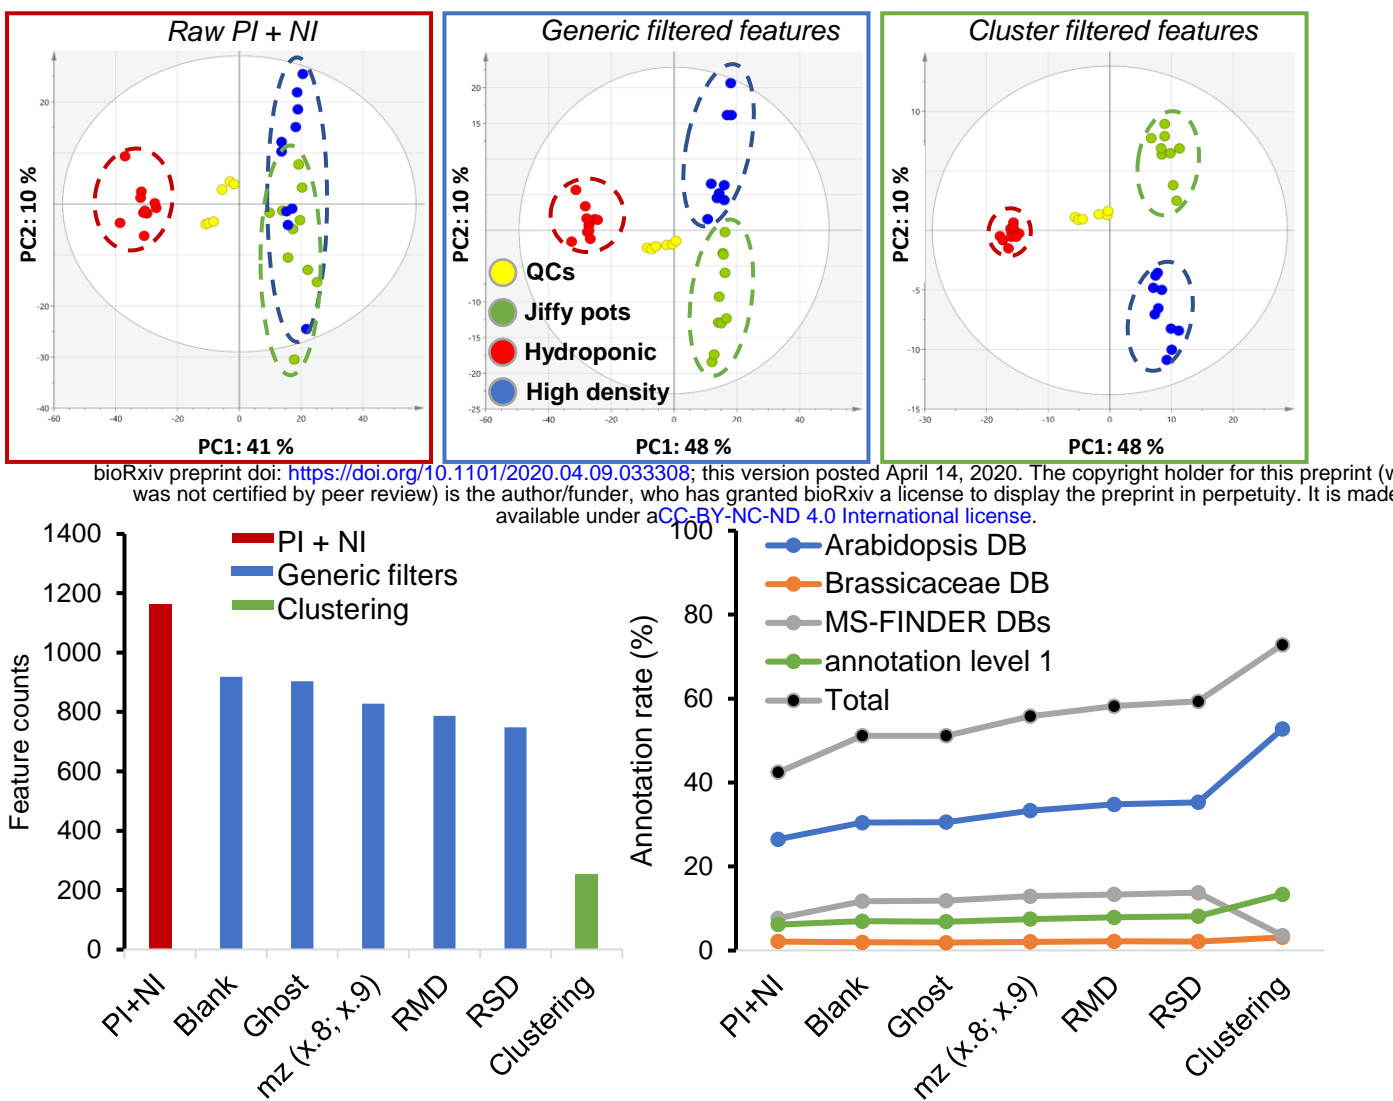

**Figure 4.** LC-MS dataset processing of the metabolomes of *A. thaliana* plants growing in different conditions. Top: Sequential PCA score plots of raw PI and NI mode data and the data after applying generic filters and feature clustering. Dotted circles indicate biological sample type distribution (yellow, QC injections; green, plants growing in Jiffy pots at low density; blue, plants growing in plastic pots at high density; red plants in hydroponic culture). Bottom: The bar plot shows the feature counts after successive filtering steps. The line plot displays the annotation rate (unique metabolites/feature counts expressed as %) after successive filtering steps using annotation DBs prioritization.

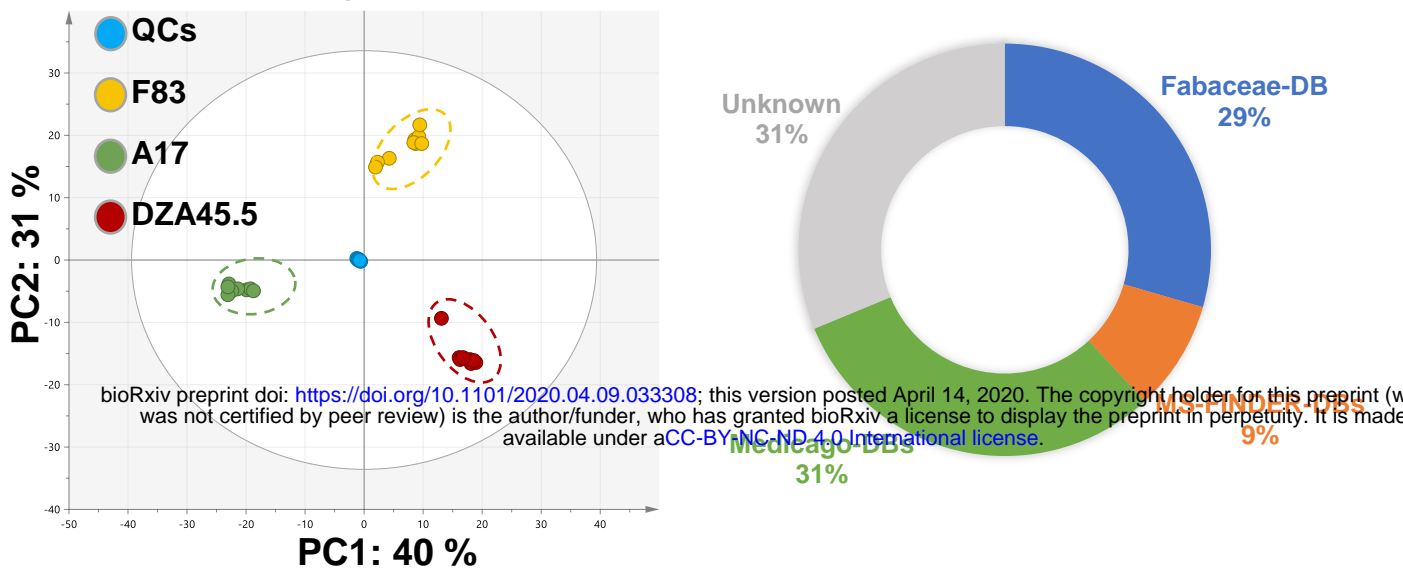

**Figure 5.** LC-MS NI dataset processing of the metabolome of roots from three strains of *M. truncatula*. Left: PCA score plot after applying the MS-CleanR workflow. Dotted circles enclose samples from each plant strain. Right: Circular plot of the proportions of features annotated with reference to the indicated databases (DB).

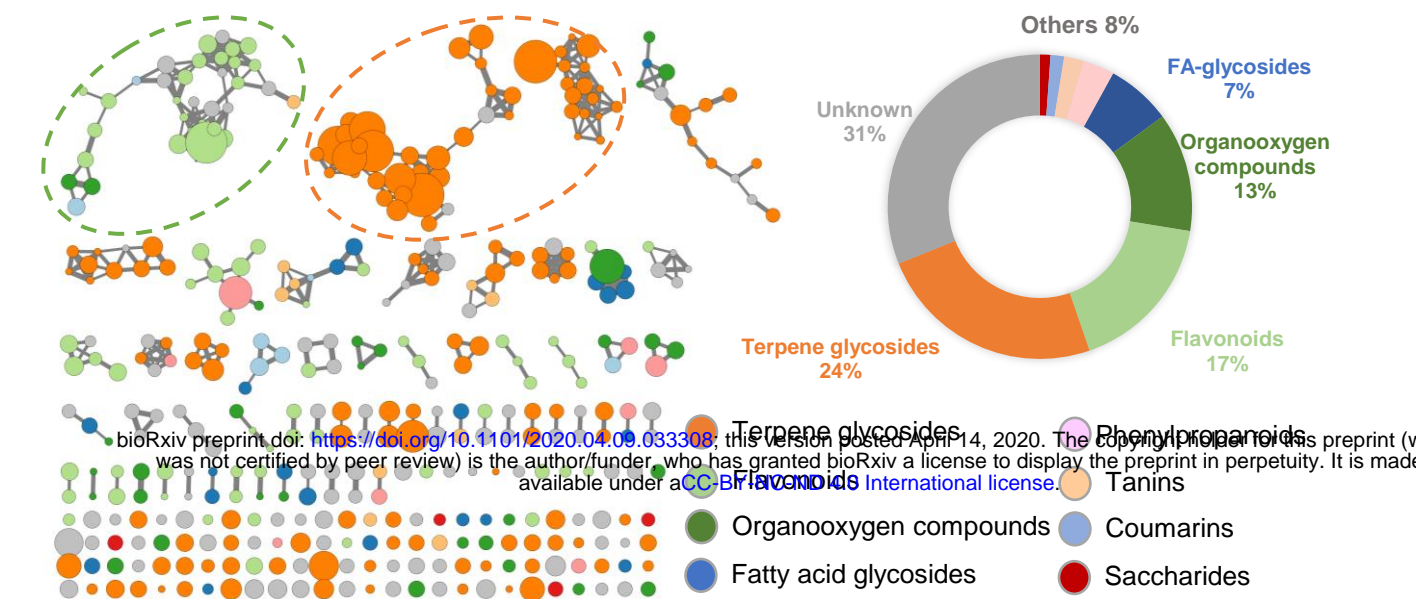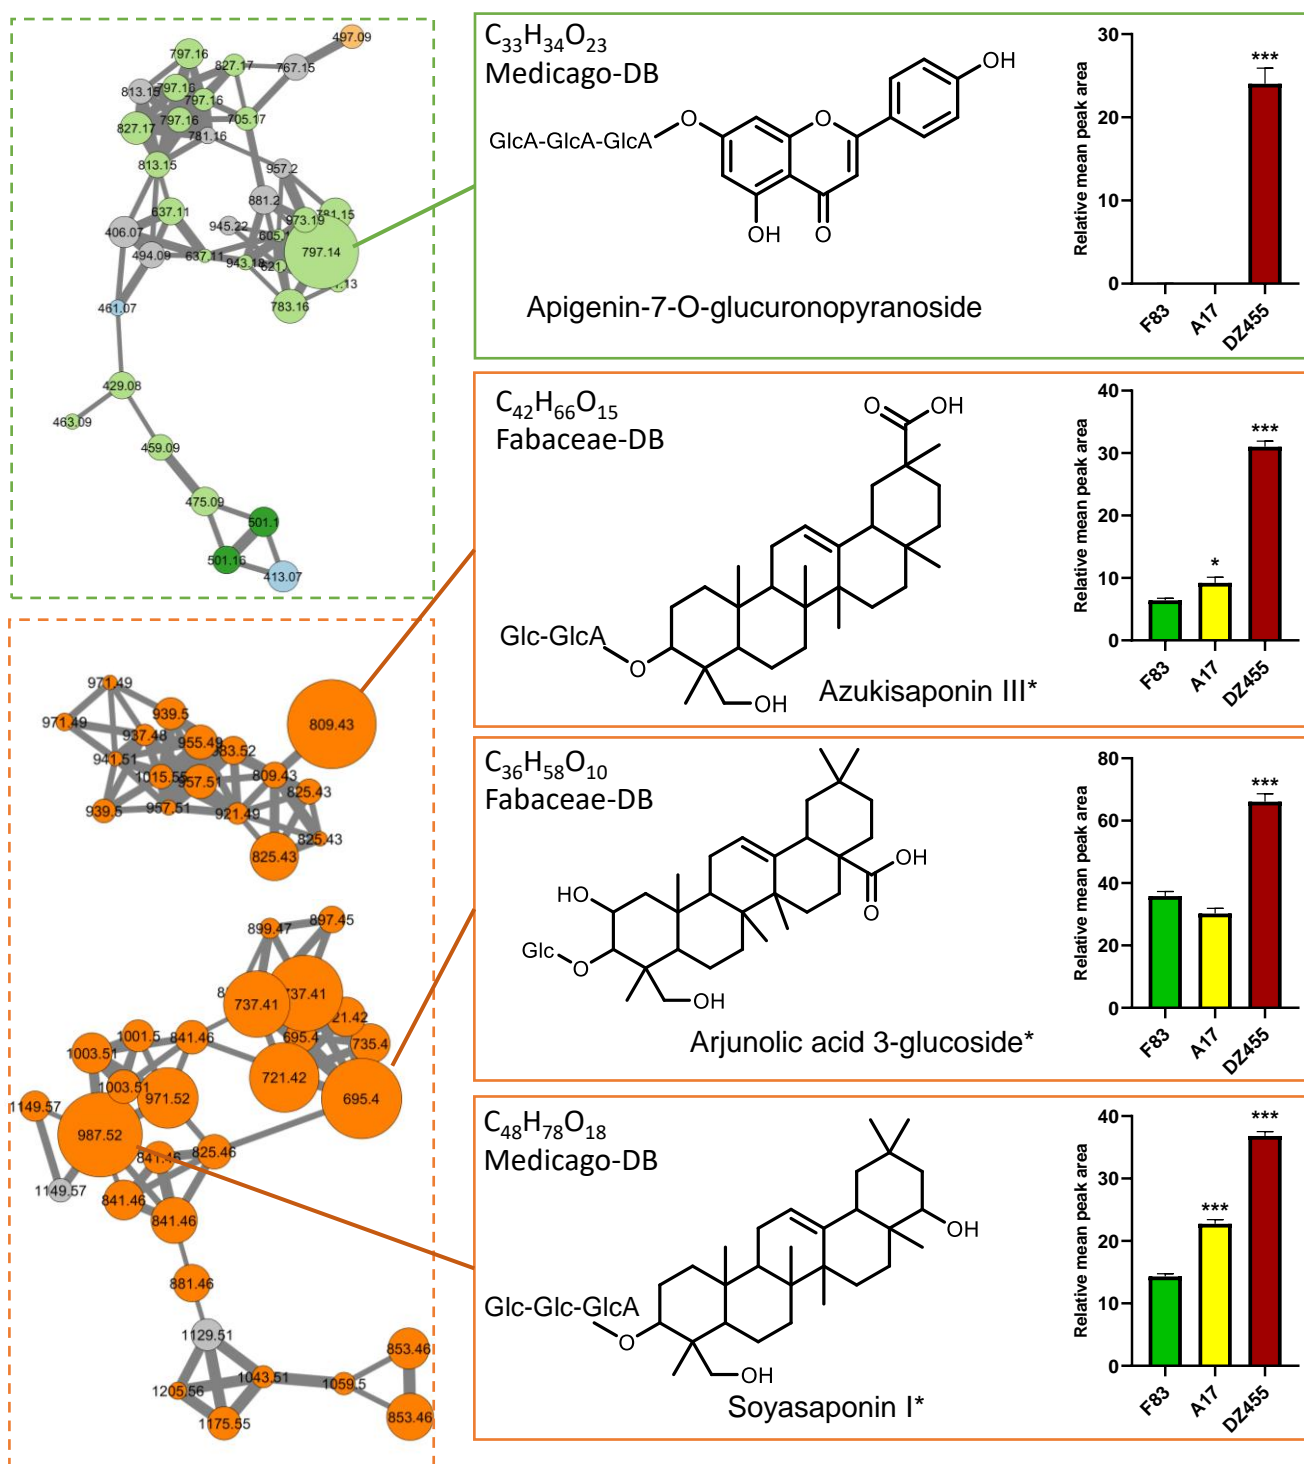

**Figure 6.** Mass spectral similarity network of *M. truncatula* NI dataset (cosine  $\geq 0.8$ ). Nodes are colored according to their chemical classes and sized relative to their OPLS regression coefficient score (See text for details). Edge width is proportional to cosine value. Pie chart display annotated chemical class ratio in LC-MS NI dataset (Others include coumarins derivatives, tanins and saccharides chemical classes). Bar plots display normalized mean peak areas for the four most highly ranked structures by OPLS-regression modeling (Table S6). One-way ANOVA and Dunnett's post-hoc test ( $p \leq 0.05$ ) were used to assess differences between the sensitive (F83) and resistant (A17 and DZA45.5) *M. truncatula* strains ( $p \leq 0.05$ : \*;  $p \leq 0.01$ : \*\*;  $p \leq 0.001$ : \*\*\*). Compound names with asterisk indicate an isobaric annotation match with ref 37. (Glc: Glucoside, GlcA: Glucuronopyranoside)
